# Supplementary material for: Co, Zn-coordinated ZIF-derived bimetal encapsulated N-doped CNTs for highly effective oxidation of benzyl alcohol at room temperature
Source: Royal Society of Chemistry journal article supplement (doi:10.1039/d4nj01685h), 2024-01-01
Supplement: d4nj01685h1.pdf [file d4nj01685h1.pdf]

**Co, Zn-coordinated ZIF-derived bimetal encapsulated N-doped CNTs for highly effective  
oxidation of benzyl alcohol at room temperature**

Yulin Li\*, Wenjie Du, Jian Wang, Zhuyin Sui, Xiufeng Xu\*

*School of Chemistry and Chemical Engineering, Yantai University, Yantai 264005, Shandong,*

*China*

\*Corresponding authors.

E-mail address: liyulin@ytu.edu.cn (Y. Li), xxf@ytu.edu.cn (X. Xu).

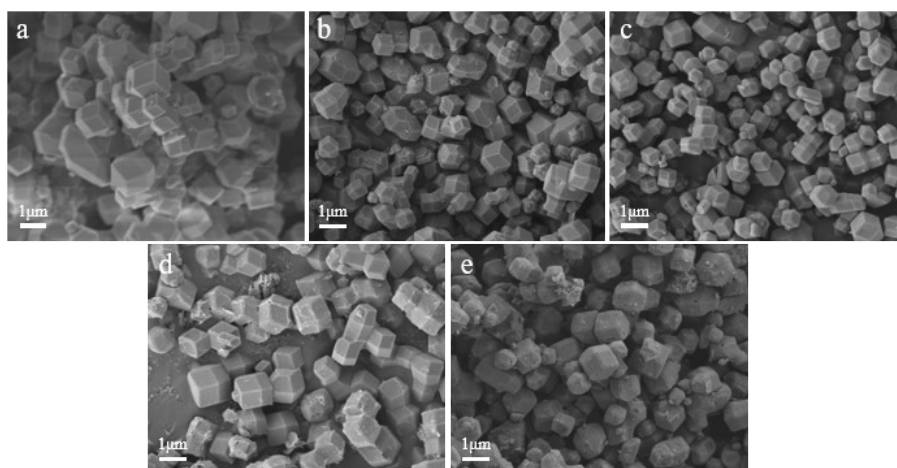

**Fig. S1** SEM images of a: ZIF-8; b: 0.5Co-ZIF-8, c: 1Co-ZIF-8, d: 1.5Co-ZIF-8, e: 2Co-ZIF-8

**Table S1** Catalytic performance at respective temperatures and solvent for selected representative benzyl alcohol oxidation systems.

| Catalyst                                         | Solvent | Temperature / °C | Time / h | Con. / % | Sel. / % | Refs.     |
|--------------------------------------------------|---------|------------------|----------|----------|----------|-----------|
| Co@NC                                            | DMF     | 90               | 5        | 78       | 94       | [1]       |
| SA-Fe/N-C                                        | Water   | 100              | 24       | 92.7     | 96.4     | [2]       |
| Co <sub>3</sub> O <sub>4</sub>                   | Toluene | 100              | 3        | 97.5     | 100      | [3]       |
| Co <sub>3</sub> O <sub>4</sub> /MnO <sub>2</sub> | Toluene | 100              | 6        | 81       | 90       | [4]       |
| Ni <sub>1</sub> Co <sub>4</sub> /SBA-15          | DMF     | 120              | 8        | 96.2     | 98.3     | [5]       |
| CoFe <sub>2</sub> O <sub>4</sub>                 | DMA     | 150              | 24       | 95.3     | 96.3     | [6]       |
| NiO/CN                                           | Water   | 25               | 0.5      | 99       | 100      | [7]       |
| Ru <sub>1</sub> /NC                              | Water   | 90               | 2        | 99       | 99       | [8]       |
| 1.5Co-Zn@N-C                                     | Toluene | 30               | 5        | 95.4     | 94.6     | This work |

[1] M. Lu, X. Hu, Q. Hu, H. Yang, D. Lai, X. Yan, R. Feng and G. Zhao, *Colloid Surf. A-Physicochem. Eng. Asp.*, 2021, 629, 127520.

[2] Q. Wei, J. Wang and W. Shen, *Appl. Catal. B-Environ.*, 2021, 292, 120195.

[3] K. Li, Y. Pei, P. Xiao, Z. Y. He, S. A. C. Carabineiro, H. Y. Jiang and J. J. Zhu, *ACS Appl. Nano Mater.*, 2022, 5, 3722-3732.

[4] V. G. Reddy, D. Jampaiah, A. Chalkidis, Y. M. Sabri, E. L. H. Mayes and S. K. Bhargava, *Catal. Commun.*, 2019, 130, 105763.

- [5] R. J. Li, Y. Y. Zhang, B. Xing, M. T. Huang, T. Wang, X. P. Hong, B. C. Zhou, B. X. Li, J. Ding and Q. Sui, *Microporous Mesoporous Mat.*, 2023, 350, 112407.
- [6] G. Gao, R. Rong, Z. Zhang, B. Pan, X. Sun, Q. Zhang, G. Zheng, K. Xu and L. Gao, *Catal. Commun.*, 2023, 183, 106757.
- [7] M. Mirhosseini, G. M. Ziarani and A. Badiei, *Int. J. Biol. Macromol.*, 2024, 259, 129093.
- [8] X. L. Dong, Y. F. Jia, M. Y. Zhang, S. Q. Ji, L. P. Leng, J. H. Horton, C. Xu, C. He, Q. Tan, J. W. Zhang and Z. J. Li, *Chem. Eng. J.*, 2023, 451, 138660.
